# Supplementary material
Source: PubMed Central journal article supplement (PMC5699077)
Supplement: pnas.201713385SI.pdf [file pnas.201713385SI.pdf]

# Supporting Information

Pennington et al. 10.1073/pnas.1713385114

Table S1. Bacterial families and genera in each treatment that are significantly different in at least one life stage pairing

| Treatment      | Phylum         | Family                 | Genus                     | Species              | Third instar–<br>sixth instar | Third instar–<br>pupa | Third instar–<br>adult | Sixth instar–<br>pupa | Sixth instar–<br>adult | Pupa–<br>adult |  |
|----------------|----------------|------------------------|---------------------------|----------------------|-------------------------------|-----------------------|------------------------|-----------------------|------------------------|----------------|--|
| Control        | Acidobacteria  | Bryobacteraceae        | <i>Bryobacter</i>         |                      | *                             | *                     | *                      |                       |                        |                |  |
|                | Acidobacteria  | Corynebacteriaceae     | <i>Corynebacterium</i>    | sp. 1, 2             | *                             | *                     | *                      |                       |                        |                |  |
|                | Bacteroidetes  | Chitinophagaceae       | <i>Sediminibacterium</i>  | sp. 1                | *                             | *                     | *                      |                       |                        |                |  |
|                | Firmicutes     | Peptoniphilaceae       | <i>Finegoldia</i>         |                      | *                             | *                     | *                      |                       |                        |                |  |
|                | Proteobacteria | Bradyrhizobiaceae      | <i>Bradyrhizobium</i>     | sp. 1, 2             | *                             | *                     | *                      |                       |                        |                |  |
|                | Proteobacteria | Burkholderiaceae       | <i>Burkholderia</i>       |                      | *                             | *                     | *                      |                       |                        |                |  |
|                | Proteobacteria | Caulobacteraceae       | <i>Caulobacter</i>        |                      | *                             | *                     | *                      |                       |                        |                |  |
|                | Proteobacteria | Hyphomicrobiaceae      | <i>Hyphomicrobium</i>     |                      | *                             | *                     | *                      |                       |                        |                |  |
|                | Proteobacteria | Methylobacteriaceae    | <i>Methylobacterium</i>   |                      | *                             | *                     | *                      |                       |                        |                |  |
|                | Proteobacteria | Pseudomonadaceae       | <i>Pseudomonas</i>        | sp. 1                | *                             | *                     | *                      |                       |                        |                |  |
|                | Proteobacteria | Rhodospirillaceae      | <i>Reyranela</i>          |                      | *                             | *                     | *                      |                       |                        |                |  |
|                | Proteobacteria | Sinobacteraceae        | <i>Nevskia</i>            |                      | *                             | *                     | *                      |                       |                        |                |  |
|                | Proteobacteria | Sinobacteraceae        | <i>Steroidobacter</i>     | sp. 1, 2             | *                             | *                     | *                      |                       |                        |                |  |
|                | Acetaminophen  | Proteobacteria         | Alcaligenaceae            | <i>Achromobacter</i> |                               | *                     |                        |                       |                        |                |  |
|                |                | Proteobacteria         | Enterobacteriaceae        | <i>Erwinia</i>       |                               | *                     |                        |                       |                        |                |  |
| Proteobacteria |                | Pseudomonadaceae       | <i>Pseudomonas</i>        | sp. 2, 3             | *                             |                       |                        |                       |                        |                |  |
| Proteobacteria |                | Xanthomonadaceae       | <i>Stenotrophomonas</i>   |                      | *                             |                       |                        |                       |                        |                |  |
| Caffeine       | Firmicutes     | Enterococcaceae        | <i>Enterococcus</i>       |                      | *                             | *                     |                        |                       |                        |                |  |
|                | Fusobacteria   | Leptotrichiaceae       | <i>Leptotrichia</i>       |                      | *                             | *                     |                        |                       |                        |                |  |
|                | Proteobacteria | Enterobacteriaceae     | <i>Erwinia</i>            | sp. 1, 2             | *                             | *                     |                        |                       |                        |                |  |
| Antibiotics    | Proteobacteria | Enterobacteriaceae     | <i>Klebsiella</i>         |                      | *                             | *                     |                        |                       |                        |                |  |
|                | Firmicutes     | Enterococcaceae        | <i>Enterococcus</i>       |                      |                               |                       | *                      |                       |                        | *              |  |
|                | Firmicutes     | Lactobacillaceae       | <i>Lactobacillus</i>      |                      |                               |                       |                        |                       | *                      | *              |  |
|                | Proteobacteria | Acetobacteraceae       | <i>Commensalibacter</i>   | sp. 1                |                               |                       |                        |                       | *                      |                |  |
|                | Proteobacteria | Acetobacteraceae       | <i>Commensalibacter</i>   | sp. 2                |                               |                       |                        |                       | *                      |                |  |
|                | Proteobacteria | Alcaligenaceae         | <i>Achromobacter</i>      |                      |                               |                       | *                      |                       | *                      | *              |  |
|                | Proteobacteria | Comamonadaceae         | <i>Pelomonas</i>          |                      |                               |                       | *                      |                       | *                      | *              |  |
|                | Proteobacteria | Enterobacteriaceae     | <i>Erwinia</i>            | sp. 1                |                               |                       | *                      |                       | *                      | *              |  |
|                | Proteobacteria | Enterobacteriaceae     | <i>Erwinia</i>            | sp. 2                |                               |                       |                        |                       | *                      |                |  |
|                | Proteobacteria | Enterobacteriaceae     | <i>Klebsiella</i>         |                      |                               |                       |                        |                       | *                      |                |  |
|                | Proteobacteria | Enterobacteriaceae     | <i>Salmonella</i>         |                      |                               |                       |                        |                       | *                      |                |  |
|                | Proteobacteria |                        | <i>Methylobacterium</i>   |                      |                               |                       | *                      |                       | *                      | *              |  |
|                | Proteobacteria |                        | <i>Pseudomonas</i>        | sp. 2, 4             |                               |                       | *                      |                       | *                      | *              |  |
|                | Proteobacteria |                        | <i>Stenotrophomonas</i>   |                      |                               |                       | *                      |                       | *                      |                |  |
| Hormones       | Proteobacteria | Comamonadaceae         | <i>Pelomonas</i>          |                      |                               |                       | *                      |                       |                        |                |  |
|                | Proteobacteria | Comamonadaceae         | <i>Variovorax</i>         |                      |                               |                       | *                      |                       |                        |                |  |
| Mixture        | Bacteroidetes  | Chitinophagaceae       | <i>Ferruginibacter</i>    | sp. 2                |                               |                       | *                      |                       | *                      | *              |  |
|                | Bacteroidetes  | Chitinophagaceae       | <i>Sediminibacterium</i>  | sp. 1                |                               |                       | *                      |                       | *                      | *              |  |
|                | Proteobacteria | Bradyrhizobiaceae      | <i>Bradyrhizobium</i>     |                      |                               |                       | *                      |                       | *                      | *              |  |
|                | Proteobacteria | Caulobacteraceae       | <i>Calobacter</i>         |                      |                               |                       | *                      |                       |                        |                |  |
|                | Proteobacteria | Ectothiorhodospiraceae | <i>Ectothiorhodospira</i> |                      |                               |                       |                        |                       |                        | *              |  |
|                | Proteobacteria | Geobacteraceae         | <i>Geobacter</i>          |                      |                               |                       | *                      |                       | *                      | *              |  |
|                | Proteobacteria | Methylobacteriaceae    | <i>Methylobacterium</i>   |                      |                               |                       | *                      |                       |                        |                |  |
|                | Proteobacteria | Sinobacteraceae        | <i>Steroidobacter</i>     |                      |                               |                       | *                      |                       |                        |                |  |

\*Adjusted *P* value of <0.05 for that life stage grouping in the genera treatment pairing.

**Table S2. Bacterial families and genera in each treatment that are significantly different in at least one treatment pairing**

| Stage          | Phylum         | Family              | Genus                  | Species           | Den   | Control          | Acetaminophen | Caffeine | Antibiotics | Hormones |   |   |
|----------------|----------------|---------------------|------------------------|-------------------|-------|------------------|---------------|----------|-------------|----------|---|---|
| Third instar   | Acidobacteria  | Bryobacteraceae     | Bryobacter             |                   | 38    | AC, CA, AN, H, M |               |          |             |          |   |   |
|                | Acidobacteria  | Corynebacteriaceae  | <i>Corynebacterium</i> | sp. 1             | 41    | AC, CA, AN, H, M |               |          |             |          |   |   |
|                | Acidobacteria  | Corynebacteriaceae  | <i>Corynebacterium</i> | sp. 2             | 42    | AN, M            |               |          |             |          |   |   |
|                | Bacteroidetes  | Chitinophagaceae    | Sediminibacterium      | sp. 1             | 4     | AC, CA, AN, H, M |               |          |             |          |   |   |
|                | Firmicutes     | Enterococcaceae     | <i>Enterococcus</i>    |                   | 20    | AN, H            | AN, H, M      |          | AN, H       |          |   |   |
|                | Firmicutes     | Lactobacillaceae    | <i>Lactobacillus</i>   | sp. 1             | 0     | AN               | AN, M         |          | AN          |          |   |   |
|                | Firmicutes     | Lactobacillaceae    | <i>Lactobacillus</i>   | sp. 2             | 2     | AN, H, M         | AN, H, M      |          | AN, H, M    |          |   |   |
|                | Firmicutes     | Peptoniphilaceae    | Finegoldia             |                   | 50    | AC, CA, AN, M    |               |          |             |          |   |   |
|                | Fusobacteria   | Leptotrichiaceae    | Leptotrichia           |                   | 107   | CA               |               |          | AN          |          |   |   |
|                | Proteobacteria | Alcaligenaceae      | Achromobacter          |                   | 3     | AN               | AN            |          | AN          |          |   |   |
|                | Proteobacteria | Bradyrhizobiaceae   | Bradyrhizobium         | sp. 1             | 31    | AC, CA, AN, H, M |               |          |             |          |   |   |
|                | Proteobacteria | Bradyrhizobiaceae   | Bradyrhizobium         | sp. 2             | 72    | AC, AN, H, M     |               |          |             |          |   |   |
|                | Proteobacteria | Burkholderiaceae    | Burkholderia           |                   | 23    | AC, CA, AN, H, M |               |          |             |          |   |   |
|                | Proteobacteria | Caulobacteraceae    | Caulobacter            |                   | 14    | AC, CA, AN, H, M |               |          |             |          |   |   |
|                | Proteobacteria | Enterobacteriaceae  | <i>Erwinia</i>         | sp. 1             | 13    | AC, AN, H        | AN, H, M      |          | AN, H       |          |   |   |
|                | Proteobacteria | Enterobacteriaceae  | <i>Erwinia</i>         | sp. 2             | 29    |                  | AN, H, M      |          | AN          |          |   |   |
|                | Proteobacteria | Enterobacteriaceae  | Klebsiella             |                   | 17    | AN, H            | AN, H         |          | AN, H       |          |   |   |
|                | Proteobacteria | Hyphomicrobiaceae   | Hyphomicrobium         |                   | 25    | AC, CA, AN, H, M |               |          |             |          |   |   |
|                | Proteobacteria | Methylobacteriaceae | Methylobacterium       |                   | 11    | AN, M            |               |          |             |          |   |   |
|                | Proteobacteria | Moraxellaceae       | <i>Acinetobacter</i>   |                   | 43    | AC               | H             |          |             |          |   |   |
|                | Proteobacteria | Pseudomonadaceae    | <i>Pseudomonas</i>     | sp. 1             | 1     |                  | AN            |          | AN          |          |   |   |
|                | Proteobacteria | Pseudomonadaceae    | <i>Pseudomonas</i>     | sp. 2             | 52    |                  | AN, H, M      |          |             |          |   |   |
|                | Proteobacteria | Pseudomonadaceae    | <i>Pseudomonas</i>     | sp. 4             | 181   | AC, AN, H, M     |               |          |             |          |   |   |
|                | Proteobacteria | Rhodospirillaceae   | Reyranella             |                   | 22    | AC, CA, AN, H, M |               |          |             |          |   |   |
|                | Proteobacteria | Sinobacteraceae     | Nevskia                |                   | 8     | AC, CA, AN, H, M |               |          |             |          |   |   |
|                | Proteobacteria | Sinobacteraceae     | Steroidobacter         | sp. 1, 2          | 12    | AC, CA, AN, H, M |               |          |             |          |   |   |
|                | Proteobacteria | Xanthomonadaceae    | Stenotrophomonas       |                   | 5     |                  | AN            |          |             |          |   |   |
|                | Sixth instar   |                     |                        |                   |       |                  |               |          |             |          |   |   |
| Pupa           | Actinobacteria | Bifidobacteriaceae  | Bifidobacterium        | sp. 1             | 61    |                  | AN            |          | AN          | H, M     |   |   |
|                | Bacteroidetes  | Chitinophagaceae    | Sediminibacterium      | sp. 1             | 4     |                  |               |          |             | M        |   |   |
|                | Firmicutes     | Enterococcaceae     | <i>Enterococcus</i>    |                   | 20    |                  |               |          |             | H, M     |   |   |
|                | Firmicutes     | Lactobacillaceae    | <i>Lactobacillus</i>   | sp. 2             | 193   |                  | AN            |          | AN          | H, M     |   |   |
|                | Proteobacteria | Acetobacteraceae    | Commensalibacter       | sp. 1, 2, 3       | 18    |                  | AN            |          | AN          | H, M     |   |   |
|                | Proteobacteria | Burkholderiaceae    | Burkholderia           |                   | 23    |                  |               |          |             | M        |   |   |
|                | Proteobacteria | Caulobacteraceae    | Caulobacter            |                   | 14    |                  |               |          |             | M        |   |   |
|                | Proteobacteria | Comamonadaceae      | Pelomonas              |                   | 9     |                  |               |          |             | M        |   |   |
|                | Proteobacteria | Enterobacteriaceae  | <i>Salmonella</i>      |                   | 68    |                  | AN            |          | AN          | H, M     |   |   |
|                | Proteobacteria | Methylobacteriaceae | Methylobacterium       |                   | 11    |                  |               |          |             | M        |   |   |
|                | Proteobacteria | Rhodospirillaceae   | Reyranella             |                   | 22    |                  |               |          |             | M        |   |   |
|                | Proteobacteria | Sinobacteraceae     | Nevskia                |                   | 8     | M                | M             | M        | M           | M        | M |   |
|                | Adult          | Bacteroidetes       | Chitinophagaceae       | Flaviumibacter    |       | 54               | M             | M        | M           | M        | M | M |
|                |                | Bacteroidetes       | Chitinophagaceae       | Sediminibacterium | sp. 1 | 4                | M             | M        | M           | M        | M | M |
|                |                | Proteobacteria      | Bradyrhizobiaceae      | Bradyrhizobium    | sp. 1 | 31               | M             | M        | M           | M        | M | M |
| Proteobacteria |                | Burkholderiaceae    | Burkholderia           |                   | 23    |                  | M             | M        | M           | M        | M |   |
| Proteobacteria |                | Caulobacteraceae    | Caulobacter            |                   | 14    | M                | M             | M        | M           | M        | M |   |
| Proteobacteria |                | Comamonadaceae      | Variovorax             |                   | 48    |                  |               | M        | M           | M        | M |   |
| Proteobacteria |                | Geobacteraceae      | Geobacter              |                   | 69    | M                | M             | M        | M           | M        | M |   |
| Proteobacteria |                | Oxalobacteraceae    | Massilia               |                   | 44    | AC, CA, AN, H, M |               |          |             |          |   |   |
| Proteobacteria |                | Rhodospirillaceae   | Reyranella             |                   | 22    | M                | M             | M        | M           | M        | M |   |
| Proteobacteria |                | Sinobacteraceae     | Nevskia                |                   | 8     | M                | M             | M        | M           | M        | M |   |
| Proteobacteria |                | Sinobacteraceae     | Steroidobacter         | sp. 2             | 34    | M                | M             | M        | M           | M        | M |   |

Lettering (AC, CA, AN, H, M) denotes adjusted *P* value of <0.05 for that treatment group (acetaminophen, caffeine, antibiotics, hormones, and mixture, respectively) in the genera life stage pairing.

**Table S3. UPLC-MS/MS chemical analysis for each chemical and their deuterated standard**

| Group      | No. | Compound                                                   | Formula                                                                                                   | Tr, min     | Molecular ions, M + H | Cone, V | Fragment ions      | CE, V  | ESI |
|------------|-----|------------------------------------------------------------|-----------------------------------------------------------------------------------------------------------|-------------|-----------------------|---------|--------------------|--------|-----|
| Antibiotic | 1   | Ciprofloxacin                                              | C <sub>17</sub> H <sub>18</sub> FN <sub>3</sub> O <sub>3</sub>                                            | 2.58 (±0.2) | 332.0343              | 48      | 245.0868; 231.0416 | 26; 32 | +   |
|            | 2   | Ciprofloxacin-D <sub>8</sub>                               | C <sub>17</sub> D <sub>8</sub> H <sub>10</sub> FN <sub>3</sub> O <sub>3</sub>                             | 2.59 (±0.2) | 336.1194              | 44      | 248.0708; 235.0031 | 22; 44 | +   |
|            | 3   | Lincomycin                                                 | C <sub>18</sub> H <sub>34</sub> N <sub>2</sub> O <sub>6</sub> S                                           | 2.14 (±0.2) | 407.1243              | 48      | 126.1087; 41.8801  | 42; 72 | +   |
|            | 4   | Lincomycin- <sup>13</sup> C-D <sub>4</sub>                 | C <sub>17</sub> <sup>13</sup> CH <sub>30</sub> D <sub>4</sub> N <sub>2</sub> O <sub>6</sub> S             | 6.62 (±0.2) | 408.2206              | 20      | 80.9941            | 16     | +   |
|            | 5   | Oxytetracycline                                            | C <sub>22</sub> H <sub>24</sub> N <sub>2</sub> O <sub>9</sub>                                             | 2.61 (±0.2) | 461.0329              | 32      | 426.0248; 201.0076 | 20; 44 | +   |
|            | 6   | Tetracycline- <sup>13</sup> C <sub>2</sub> -D <sub>6</sub> | C <sub>29</sub> <sup>13</sup> C <sub>2</sub> H <sub>18</sub> D <sub>6</sub> N <sub>2</sub> O <sub>8</sub> | 2.49 (±0.2) | 451.1181              | 32      | 416.1078; 104.0699 | 18; 44 | +   |

CE, collision energy.
